1 **A large, open source dataset of stroke anatomical brain images and manual**  
2 **lesion segmentations**

3

4 **Authors**

5 Sook-Lei Liew<sup>1†\*</sup>, Julia M. Anglin<sup>1\*</sup>, Nick W. Banks<sup>1</sup>, Matt Sondag<sup>1</sup>, Kaori L. Ito<sup>1</sup>,  
6 Hosung Kim<sup>1</sup>, Jennifer Chan<sup>1</sup>, Joyce Ito<sup>1</sup>, Connie Jung<sup>1</sup>, Nima Khoshab<sup>2</sup>, Stephanie  
7 Lefebvre<sup>1</sup>, William Nakamura<sup>1</sup>, David Saldana<sup>1</sup>, Allie Schmiesing<sup>1</sup>, Cathy Tran<sup>1</sup>,  
8 Danny Vo<sup>1</sup>, Tyler Ard<sup>1</sup>, Panthea Heydari<sup>1</sup>, Bokkyu Kim<sup>1</sup>, Lisa Aziz-Zadeh<sup>1</sup>, Steven C.  
9 Cramer<sup>2</sup>, Jingchun Liu<sup>3</sup>, Surjo Soekadar<sup>4</sup>, Jan-Egil Nordvik<sup>5</sup>, Lars T. Westlye<sup>6,7</sup>,  
10 Junping Wang<sup>3</sup>, Carolee Winstein<sup>1</sup>, Chunshui Yu<sup>3</sup>, Lei Ai<sup>8</sup>, Bonhwang Koo<sup>8</sup>, R.  
11 Cameron Craddock<sup>8,9</sup>, Michael Milham<sup>8,9</sup>, Matthew Lakich<sup>10</sup>, Amy Pienta<sup>11</sup>, Alison  
12 Stroud<sup>11</sup>

13

14 **Affiliations**

- 15 1. University of Southern California, Los Angeles, California, USA  
16 2. University of California, Irvine, Irvine, California, USA  
17 3. Tianjin Medical University General Hospital, Tianjin, China  
18 4. University of Tübingen, Tübingen, Germany  
19 5. Sunnaas Rehabilitation Hospital HT, Nesodden, Norway  
20 6. NORMENT and KG Jebsen Centre for Psychosis Research, Division of Mental  
21 Health and Addiction, Oslo University Hospital, Oslo, Norway  
22 7. Department of Psychology, University of Oslo, Oslo, Norway  
23 8. Child Mind Institute, New York, New York, USA  
24 9. Nathan S. Kline Institute for Psychiatric Research, Orangeburg, New York, USA  
25 10. University of Texas Medical Branch, Galveston, Texas, USA  
26 11. University of Michigan, Ann Arbor, Michigan

27

28 † Corresponding author: Sook-Lei Liew ([sliew@usc.edu](mailto:sliew@usc.edu))

29 \* Denotes equal contributions

30

31

1 **Abstract**

2

3 Stroke is the leading cause of adult disability worldwide, with up to two-thirds  
4 of individuals experiencing long-term disabilities. Large-scale neuroimaging  
5 studies have shown promise in identifying robust biomarkers (e.g., measures  
6 of brain structure) of long-term stroke recovery following rehabilitation.  
7 However, analyzing large rehabilitation-related datasets is problematic due to  
8 barriers in accurate stroke lesion segmentation. Manually-traced lesions are  
9 currently the gold standard for lesion segmentation on T1-weighted MRIs, but  
10 are labor intensive and require anatomical expertise. While algorithms have  
11 been developed to automate this process, the results often lack accuracy.  
12 Newer algorithms that employ machine-learning techniques are promising, yet  
13 these require large training datasets to optimize performance. Here we  
14 present ATLAS (Anatomical Tracings of Lesions After Stroke), an open-source  
15 dataset of 304 T1-weighted MRIs with manually segmented lesions and  
16 metadata. This large, diverse dataset can be used to train and test lesion  
17 segmentation algorithms and provides a standardized dataset for comparing  
18 the performance of different segmentation methods. We hope ATLAS release  
19 1.1 will be a useful resource to assess and improve the accuracy of current  
20 lesion segmentation methods.

21

22

## 1 Background & Summary

2

3

4

5

6

7

8

9

10

11

12

13

14

15

16

17

18

19

20

21

22

23

24

25

26

27

28

29

30

31

32

33

34

35

36

37

38

39

40

41

42

43

44

45

46

47

48

49

50

51

Approximately 795,000 people in the United States suffer from a stroke every year, resulting in nearly 133,000 deaths<sup>1</sup>. In addition, up to 2/3 of stroke survivors experience long-term disabilities that impair their participation in daily activities<sup>2,3</sup>. Careful clinical decision making is thus critical both at the acute stage, where interventions can spare neural tissue or be used to promote early functional recovery<sup>4</sup>, and at the subacute/chronic stages, where effective rehabilitation can promote long-term functional recovery. Enormous efforts have been made to predict outcomes and response to treatments at both acute and subacute/chronic stages using brain imaging.

At the acute stage, within the first 24 hours or so after stroke onset, clinicians face important, time-sensitive decisions such as whether to intervene to save damaged tissue (e.g., administer thrombolytic drugs, perform surgery). Clinical brain images such as magnetic resonance imaging (MRI) and computerized tomography (CT) scans are routinely acquired to help diagnose and make these urgent clinical decisions. Images obtained often include lower-resolution CT scans or structural MRIs (e.g., T2-weighted, FLAIR, diffusion weighted, or perfusion weighted MRIs), and impressive efforts have been made to use these images to automatically detect the lesion volume, predict responses to acute interventions, and predict general prognosis. As clinical scans are typically a mandatory part of acute stroke care, there has been excellent progress in using large-scale datasets of the acquired images to relate to outcomes and build automated lesion detection algorithms and predictive models over the past few decades<sup>5</sup>. In addition, using imaging to assess the extent of neural injury within the first few days after stroke can be helpful for informing entry criteria and stratification variables for enrollment in clinical trials of early recovery therapies, which have specific time windows shortly after stroke onset<sup>4</sup>.

On the other hand, there have been fewer advances in large-scale neuroimaging-based stroke predictions at the subacute and chronic stages. Here, clinicians must triage patients and assign scarce rehabilitation resources to those who are most likely to benefit and recover. Brain imaging, such as MRI, is primarily acquired as part of research studies to understand brain-related changes in response to different therapeutic interventions or to provide valuable additional information, beyond what can be gleaned from bedside exams, that can be used to predict rehabilitation outcomes<sup>6</sup>. As stroke is a leading cause of adult disability worldwide, there is a large emphasis placed on predicting and understanding how to best promote long-term rehabilitation in these individuals. Although there are fewer MRIs acquired during this time, the most common research scan is a high-resolution T1-weighted structural MRI, which is often acquired along with functional MRI and high-resolution diffusion MRI scans and can show infarcts at the post-acute stage. Research using these types of images at this stage of stroke have shown promising biomarkers that could potentially provide additional information, beyond behavioral assessments, to predict an individual's likelihood of recovery for specific functions (e.g., motor, speech) and response to treatments<sup>7-9</sup>. Thus far, measures that include the size, location, and overlap of the lesion with existing brain regions or structures, such as the corticospinal tract, have been successfully used as predictors of long-term stroke recovery and rehabilitation<sup>9-15</sup>. However, to date, this has only been

1 done in smaller-scale studies, and results may conflict across studies or be  
2 limited to each sample. Examining lesion properties with larger datasets at the  
3 subacute and chronic stages could lead to the identification of more robust  
4 biomarkers for rehabilitation that are widely applicable across diverse  
5 populations. Recently, efforts for creating large-scale stroke neuroimaging  
6 datasets across all time points since stroke onset have emerged and offer a  
7 promising approach to achieve a better understanding of the long-term stroke  
8 recovery process (e.g., ENIGMA Stroke Recovery;  
9 <http://enigma.ini.usc.edu/ongoing/enigma-stroke-recovery/>).

10 However, a key barrier to properly analyzing these large-scale stroke  
11 neuroimaging datasets to predict rehabilitation outcomes is accurate lesion  
12 segmentation. While many acute neuroimaging stroke studies bypass manual  
13 lesion segmentation by using a visual scoring of lesion characteristics with  
14 validated scoring tools applied by expert raters, research studies that wish to  
15 examine the overlap of the lesion with specific brain structures (e.g., in voxel-  
16 based lesion symptom mapping, or lesion load methods) require an accurate  
17 and detailed lesion map. In T1-weighted MRIs, which are often used in  
18 research, the gold standard for delineating these lesions is manual  
19 segmentation, a process that requires skilled tracers and can be prohibitively  
20 time consuming and subjective<sup>16</sup>. A single large or complex lesion can take up  
21 to several hours for even a skilled tracer. As a result of this demand on time  
22 and effort, this method, which has been used in previous smaller  
23 neuroimaging studies, is not suitable for larger sample sizes. Based on the  
24 literature, most studies with manually segmented brain lesions on T1-weighted  
25 MRIs use smaller sample sizes between 10 to just over 100 brains<sup>16-20</sup>.  
26 Accurately segmenting hundreds or thousands of stroke lesions from T1-  
27 weighted MRIs may thus present a barrier for larger-scale stroke  
28 neuroimaging studies.

29 Many stroke neuroimaging studies have utilized semi- or fully-  
30 automated lesion segmentation tools for their analyses. Semi-automated  
31 segmentation tools employ a combination of automated algorithms, which  
32 detect abnormalities in the MR image, and manual corrections or inputs by an  
33 expert. Fully-automated algorithms rely completely on the algorithm for the  
34 lesion segmentation. While these require little human input or expertise, they  
35 still may require significant computational resources and processing time.  
36 Many of these fully-automated algorithms employ machine learning  
37 techniques that require training and testing on large datasets<sup>21</sup>, and the  
38 performance of the algorithm is highly dependent on the size and diversity of  
39 the training dataset. While there have been several exciting initiatives  
40 regarding lesion segmentation in acute clinical imaging, discussed below,  
41 there are few publically available large training/test datasets of manually  
42 segmented stroke lesion masks on research-grade T1-weighted images that  
43 could be used for improving such algorithms. Thus, while both semi- and fully-  
44 automated lesion segmentation tools have the potential to greatly reduce the  
45 time and expertise needed to analyze stroke MRI data<sup>22</sup>, it is unclear whether  
46 they provide the accuracy needed for rigorous stroke lesion-based analyses.

47 In addition, it is difficult to compare the performance of automated  
48 lesion segmentation tools as they are often not evaluated for performance on  
49 the same dataset. Recently, some exciting initiatives have emerged to  
50 develop better segmentation algorithms using standardized datasets and  
51 metrics. In particular, the Ischemic Stroke Lesion Segmentation (ISLES)

1 challenge is an annual satellite challenge of the Medical Image Computing  
2 and Computer Assisted Intervention (MICCAI) meeting that provides a  
3 standardized multimodal clinical MRI dataset of approximately 50-100 brains  
4 with manually segmented lesions<sup>23</sup>. The ISLES competition encourages  
5 research groups to use the dataset to evaluate their lesion segmentation  
6 algorithms and predict acute outcomes to inform clinical decision making. This  
7 approach is promising for developing better lesion segmentation algorithms  
8 and predictive models for acute imaging. However, past ISLES challenge  
9 datasets have traditionally focused more on using multimodal clinical MRIs to  
10 predict more acute results, and these algorithms are not easily translatable to  
11 the high-quality T1-weighted MRIs typically found in subacute/chronic stroke  
12 rehabilitation research. Thus, here, we aimed to develop a complementary  
13 large dataset using only anatomical T1-weighted MRIs, which are typically  
14 acquired in research studies after the acute stage to assess rehabilitation  
15 outcomes. We anticipate this dataset could be useful for enhancing lesion  
16 segmentation methods for T1-weighted images often used in medical  
17 rehabilitation research.

18 Here, we present ATLAS (Anatomical Tracings of Lesions After Stroke)  
19 Release 1.1, an open-source dataset consisting of 304 T1-weighted MRIs with  
20 manually segmented diverse lesions and metadata. The goal of ATLAS is to  
21 provide the research community with a standardized training and testing  
22 dataset for lesion segmentation algorithms on T1-weighted MRIs. We note  
23 that this dataset is not representative of the full range of stroke, as this data  
24 was acquired through research studies in which individuals with stroke  
25 voluntarily participated, and all participants had to be eligible for a research  
26 MRI session. However, this dataset may be useful for testing and comparing  
27 the performance of different lesion segmentation techniques and identifying  
28 key barriers hindering the performance of automated lesion segmentation  
29 algorithms. We believe that this diverse set of manually segmented lesions will  
30 serve as a valuable resource for researchers to use in assessing and  
31 improving the accuracy of lesion segmentation tools.

32

## 33 **Methods**

34

### 35 *Data Overview*

36 304 MRI images from 11 cohorts worldwide were collected from research  
37 groups in the ENIGMA Stroke Recovery Working Group consortium. Images  
38 consisted of T1-weighted anatomical MRIs of individuals after stroke. These  
39 images were collected primarily for research purposes and are not  
40 representative of the overall general stroke population (e.g., only including  
41 individuals who opt in to participate in a research study, and excluding  
42 individuals with stroke who cannot undergo MRI safely).

43 For each MRI, brain lesions were identified and masks were manually  
44 drawn on each individual brain in native space using MRICron<sup>24</sup>, an open-  
45 source tool for brain imaging visualization and defining volumes of interest  
46 (<http://people.cas.sc.edu/rorden/mricron/index.html>). At least one lesion mask  
47 was identified for each individual MRI. If additional, separate (non-contiguous)  
48 lesions were identified, they were traced as separate masks. An expert  
49 neuroradiologist reviewed all lesions to provide additional qualitative  
50 descriptions of the type of stroke, primary lesion location, vascular territory,  
51 and intensity of white matter disease. Finally, a separate tracer performed



1 quality control on each lesion mask. This included assessing the accuracy of  
2 the lesion segmentations, revising the lesion mask if needed, and categorizing  
3 the lesions to generate additional data such as the number of lesions in left  
4 and right hemispheres, and in cortical and subcortical regions. This dataset is  
5 provided in native subject space and archived (n=304). A subset of this  
6 dataset was also defaced, intensity normalized, and provided in standard  
7 space (normalized to the MNI-152 template, n=229; for an overview of the  
8 dataset and archives, see Figure 1).

9  
10 All ATLAS contributions were based on studies approved by local ethics  
11 committees and were conducted in accordance with the 1964 Declaration of  
12 Helsinki. Informed consent was obtained from all subjects. The receiving site's  
13 ethics committee at the University of Southern California approved the receipt  
14 and sharing of the de-identified data. Data were fully de-identified by removing  
15 all 18 HIPAA (Health Insurance Portability and Accountability)-protected  
16 health information identifiers, lesions were manually segmented on each MRI,  
17 and all data were visually inspected before release. In addition, the terms of  
18 the data sharing agreements were approved by the University of Southern  
19 California's technology transfer office.

#### 20 21 *Data Characteristics*

22 All T1-weighted MRI data were collected on 3T MRI scanners at a resolution  
23 of 1 mm<sup>3</sup> (isotropic), with the exception of data from cohorts 1 and 2 which  
24 were collected on a 1.5T scanner with a resolution of 0.9 mm x 0.9 mm x 3.0  
25 mm (excluded from the normalized dataset). Scanner information (scanner  
26 strength, brand) and image resolution are included in the ATLAS meta-data,  
27 and sample image header information for a subject from each of the cohorts  
28 can be found in *Supplementary Information*.

29  
30 Characteristics of the ATLAS dataset include an average lesion volume  
31 across all cohorts of  $2.128 \pm 3.898 \times 10^4$  mm<sup>3</sup>, with a minimum lesion size of 10  
32 mm<sup>3</sup> and a maximum lesion size of  $2.838 \times 10^5$  mm<sup>3</sup>. Information regarding  
33 the distribution of lesions in the ATLAS dataset (e.g., single versus multiple  
34 lesions per individual, percent of lesions that are left versus right hemisphere,  
35 or subcortical versus cortical) can be found in Tables 1 and 2. Overall, slightly  
36 more than half of the subjects had only one lesion (58%) while the rest had  
37 multiple lesions (42.1%). Lesions were roughly equally distributed between left  
38 and right hemispheres (48.4% left hemisphere, 43.8% right hemisphere, 7.7%  
39 other location such as brainstem or cerebellum). In this dataset, there were  
40 more subcortical lesions than cortical lesions (70.7% subcortical, 21.5%  
41 cortical, 7.7% other).

42  
43 **Table 1.** A total of 304 subjects within 11 cohorts were included in the full  
44 ATLAS Release 1.1 native dataset. The number of brains in which only one  
45 lesion was found (left/right hemispheres and other locations found within the  
46 brainstem and cerebellum, etc.), and the number of brains in which multiple  
47 lesions were found, are shown.

| Cohort | Number of Subjects | Brains with One Lesion |       |       | Brains with |
|--------|--------------------|------------------------|-------|-------|-------------|
|        |                    | Left                   | Right | Other |             |

|                         |            |              |              |             | <b>Multiple Lesions</b> |
|-------------------------|------------|--------------|--------------|-------------|-------------------------|
| c0001                   | 6          | 3            | 2            | 0           | 1                       |
| c0002                   | 25         | 6            | 12           | 1           | 6                       |
| c0003                   | 55         | 14           | 19           | 0           | 22                      |
| c0004                   | 34         | 7            | 3            | 1           | 23                      |
| c0005                   | 30         | 9            | 3            | 6           | 12                      |
| c0006                   | 12         | 4            | 1            | 2           | 5                       |
| c0007                   | 36         | 9            | 9            | 0           | 18                      |
| c0008                   | 32         | 8            | 11           | 0           | 13                      |
| c0009                   | 12         | 8            | 0            | 0           | 4                       |
| c0010                   | 47         | 9            | 10           | 7           | 21                      |
| c0011                   | 15         | 1            | 11           | 0           | 3                       |
| <b>Total</b>            | <b>304</b> | <b>78</b>    | <b>81</b>    | <b>17</b>   | <b>128</b>              |
| <b>% Total Subjects</b> |            | <b>25.7%</b> | <b>26.7%</b> | <b>5.6%</b> | <b>42.1%</b>            |

1  
2  
3  
4  
5  
6  
7

**Table 2.** The number of lesions found in each location (i.e. cortical vs. subcortical; left vs. right hemispheres), and other locations (i.e., brainstem, cerebellum, etc.) are shown. Here we have included primary lesions as well as additional lesions, resulting in 521 total lesion masks across n=304.

| <b>Cohort</b>         | <b>Cortical Lesions</b> |              | <b>Subcortical Only Lesions</b> |              | <b>Other Lesion Locations</b> |
|-----------------------|-------------------------|--------------|---------------------------------|--------------|-------------------------------|
|                       | <b>Left</b>             | <b>Right</b> | <b>Left</b>                     | <b>Right</b> |                               |
| c0001                 | 2                       | 2            | 2                               | 1            | 0                             |
| c0002                 | 1                       | 7            | 14                              | 11           | 4                             |
| c0003                 | 3                       | 0            | 38                              | 44           | 0                             |
| c0004                 | 7                       | 6            | 31                              | 32           | 7                             |
| c0005                 | 9                       | 1            | 20                              | 14           | 7                             |
| c0006                 | 3                       | 2            | 8                               | 3            | 3                             |
| c0007                 | 8                       | 10           | 28                              | 18           | 4                             |
| c0008                 | 6                       | 13           | 20                              | 13           | 1                             |
| c0009                 | 5                       | 3            | 12                              | 2            | 0                             |
| c0010                 | 11                      | 8            | 21                              | 24           | 13                            |
| c0011                 | 0                       | 5            | 3                               | 10           | 1                             |
| <b>Total</b>          | <b>55</b>               | <b>57</b>    | <b>197</b>                      | <b>172</b>   | <b>40</b>                     |
| <b>%Total Lesions</b> | <b>10.6%</b>            | <b>10.9%</b> | <b>37.8%</b>                    | <b>32.9%</b> | <b>7.7%</b>                   |

8  
9  
10  
11  
12  
13  
14  
15  
16  
17

### *Training Individuals Performing Lesion Tracing*

Eleven individuals were carefully trained in identifying and segmenting lesions. Individuals had a range of backgrounds, including undergraduate students, graduate students, and postdoctoral fellows. All tracers were given detailed information regarding neuroanatomy, and underwent standardized training, which utilized a detailed protocol as well as an instructional video. All tracers were guided through the training process with extensive feedback on lesion tracing performance by an expert tracer and in consultation with an expert neuroradiologist. The detailed protocol, with pictures of example tracings, is

1 freely available and can be found on the ATLAS GitHub website  
2 (<https://github.com/npn/ATLAS/>). All individuals were trained on an initial set  
3 of 5 brains with varying lesion sizes and locations (size range: min: 1,871  
4 mm<sup>3</sup>, max: 162,015 mm<sup>3</sup>; location: cortical [Left: 0, Right: 1], subcortical [Left:  
5 4, Right: 0]). After tracing the first set of 5 lesions, tracings were reviewed by  
6 an experienced tracer and differences in the lesion masks were discussed  
7 with the tracer. One week later, individuals retraced the lesions on the same  
8 set of 5 brains, but were blinded to their first segmentation attempt to examine  
9 intra-tracer reliability. After this, each lesion segmentation was reviewed by a  
10 separate tracer. In addition, the primary lesion location was identified by an  
11 expert neuroradiologist, who also created the meta-data (see *Metadata*  
12 below). Any questions regarding lesion masks were referred to the  
13 neuroradiologist. Inter- and intra-rater reliability measures and additional  
14 technical validation of the lesion tracings can be found in *Technical Validation*  
15 below. Finally, we note that lesion tracing is a subjective process, even across  
16 trained individuals. As mentioned in *Usage Notes* below, any problems,  
17 questions, or issues with specific lesion masks can be publically reported on  
18 our ATLAS GitHub under the Issues page  
19 (<https://github.com/npn/ATLAS/issues>) so that the community of users can  
20 make comments and be aware of any identified issues. We will work to  
21 resolve any issues in a timely manner.

22

### 23 *Identifying and Tracing Lesions*

24 To identify lesions, each T1-weighted MRI image was displayed using the  
25 multiple view option in MRICron<sup>20</sup>, which displays the brain in the coronal,  
26 sagittal, and axial view (see Figure 2). To identify lesions, tracers looked for  
27 darker intensities within typically healthy tissue. For lesions that were more  
28 difficult to detect with the grayscale setting, colored look-up table settings  
29 (e.g., “cardiac”, “NIH”, or “spectrum” settings in MRICron) were used to provide  
30 additional insight. Once the lesion or lesions were identified, the lesion mask  
31 was traced using either the coronal or axial view, using either a mouse, track  
32 pad, or tablet (i.e. Wacom Intuos Draw). A combination of MRICron tools was  
33 used to draw the lesion masks, which included the 3D fill tool, the pen tool and  
34 the closed pen tool. Typically, and especially for larger sized lesions, tracers  
35 used the 3D fill tool to begin the segmentation. Crosshairs were placed in the  
36 center of the identified lesion and the tool would fill in voxels similar to the one  
37 at the point of origin with the selected radius and at the sensitivity specified by  
38 the difference from origin and difference at edge tools. The pen and closed  
39 pen tool, typically was used to fill in (or remove) the areas that the 3D tool had  
40 missed or was used to trace smaller lesions slice by slice. Once completed,  
41 lesion masks were saved in the volume of interest (VOI) file format with the  
42 identifier name “cXXXXsXXXXtXX\_LesionRaw” (see *Data Records* and Table  
43 3 below for full naming conventions). Lesions masks were then checked for  
44 correctness by a separate tracer, who made additional corrections to the  
45 lesion mask, if needed. After lesions were identified as being correct, masks  
46 were smoothed using MRICron’s smooth VOI tool where the full width half  
47 maximum parameter was set to 2 mm and the threshold was set to 0.5. These  
48 masks were saved in both VOI and NIfTI file formats with the identifier name  
49 “cXXXXsXXXXtXX\_LesionSmooth”.

50 Any additional lesions that were not contiguous with the primary lesion  
51 mask were drawn as separate lesion masks and labeled. As described in *Data*



1 *Records*, any secondary lesions followed the same procedures as the primary  
2 lesion mask, but were labeled as Lesion\_1, Lesion\_2, Lesion\_3 and so on,  
3 with the naming convention moving from the largest to smallest mask (e.g.,  
4 Lesion\_1 is the largest secondary lesion mask). In general, the primary lesion  
5 mask was the largest lesion, with any secondary lesion masks subsequently  
6 named and ordered by size (largest to smallest). The only exception to this  
7 was, in the case of multiple lesions, if the neuroradiologist identified a primary  
8 stroke location as a different lesion from the largest lesion mask. In these  
9 cases, we used the lesion identified by the neuroradiologist as the primary  
10 mask. This occurred in less than 5% of the subjects.

11

### 12 *Metadata*

13 For each lesion, we also provided metadata on the lesion properties to give  
14 the user additional qualitative information, beyond the binary lesion mask. This  
15 information can be used to quickly sort the dataset based on specific lesion  
16 characteristics (e.g., only left hemisphere lesions, or only subcortical lesions).  
17 It can also provide additional insight into the types of lesions that succeed or  
18 fail for a given lesion segmentation algorithm. The lesion properties were  
19 manually reported for each individual lesion mask. These include the number  
20 of lesions identified and traced, and the location of each lesion (i.e. right/left,  
21 subcortical, cortical, or other). In order to count each lesion only once, we  
22 defined subcortical lesions as lesions that are contained completely in the  
23 white matter and subcortical structures. Any lesion that extends beyond this  
24 area and into the cortex is considered a cortical lesion. In this way, cortical  
25 lesions may extend into the subcortical space, but subcortical lesions do not  
26 extend into the cortical space. “Other” includes the brainstem and cerebellum.  
27 An experienced neuroradiologist also identified the following information for  
28 each individual brain: the type of stroke (e.g., embolic, hemorrhagic), primary  
29 stroke location, vascular territory, and intensity of white matter disease  
30 (periventricular hyperintensities, or PVH, and deep white matter  
31 hyperintensities, or DWMH). White matter hyperintensities were graded using  
32 the Fazekas scale<sup>25</sup>. For periventricular hyperintensities, the following grades  
33 were applied: 0 = absence, 1 = “caps” or pencil-thin lining, 2 = smooth “halo”,  
34 3 = irregular PVH extending into the deep white matter. For deep white matter  
35 hyperintensities, the following grades were applied: a = absence, 1 = punctate  
36 foci, 2 = beginning confluence of foci, 3 = large confluent areas. The white  
37 matter hyperintensity ratings are included because areas of white matter  
38 hyperintensity often pose challenges for lesion segmentation algorithms.  
39 Finally, scanner strength, brand/model, and image resolution are included in  
40 the metadata as well.

41

### 42 *Normalization to a Standard Template, Intensity Normalization, and Defacing*

43 To expand access to the dataset, we have also provided a subset of the data  
44 that is defaced, intensity-normalized, and normalized to standard (MNI-152)  
45 space. Lesion segmentation algorithms vary in whether the input should be in  
46 native (subject) space or a standardized space. Therefore, to provide this  
47 option for users, we also generated a version of the ATLAS dataset in  
48 standard space. To convert the images to standard space, MRI images first  
49 underwent automated correction for intensity non-uniformity and intensity  
50 standardization using custom scripts derived from the MINC-toolkit<sup>26</sup>  
51 (<https://github.com/BIC-MNI/minc-toolkit>). These corrected images were

1 linearly registered to the MNI-152 template using a version that was  
2 nonlinearly constructed and symmetric (version 2009;  
3 <http://www.bic.mni.mcgill.ca/ServicesAtlases/ICBM152NLin2009>) to normalize  
4 their intracranial volume in a standardized stereotaxic space<sup>27</sup>. Using the  
5 resulting transformation matrix, the labels drawn on the MRI images were also  
6 registered to the MNI template. The MRI images were resampled using the  
7 linear interpolation whereas their labels used a nearest neighborhood  
8 interpolation to keep their binary nature. Finally . Freesurfer's mri\_deface tools  
9 were used to perform the defacing (e.g., to remove any facial structures)  
10 ([https://surfer.nmr.mgh.harvard.edu/fswiki/mri\\_deface](https://surfer.nmr.mgh.harvard.edu/fswiki/mri_deface)) on all T1-weighted  
11 images.

12 Due to technical difficulties and differences in scanner image quality, a  
13 subset of brains is not included in the standard space conversion, resulting in  
14 a total of n=229 ATLAS brains converted into standard MNI space. Scans  
15 from the two cohorts with 0.9 x 0.9 x 3.0 mm resolution images, collected on  
16 1.5T scanners, were excluded from this standardized dataset due to their  
17 lower resolution. In addition, any images that failed registration were excluded.  
18 Primary reasons for failed registration include large lesion volumes or poor  
19 image quality (e.g., image artifacts, motion artifacts). We are currently working  
20 on manually editing the registrations for these images, which will be released  
21 in the future. This dataset can be widely accessed from the FCP-INDI archive  
22 (see Figure 1 and Table 3 for archive details). All images were named in  
23 accordance with the INDI data policy, following the Brain Imaging Data  
24 Structure (BIDS), and a meta-data sheet using the INDI naming convention is  
25 included with this dataset.

### 27 *Probabilistic Spatial Mapping of ATLAS Lesion Labels*

28 We also created a probabilistic spatial mapping of the lesion labels solely to  
29 visualize the distribution of lesion masks across the normalized ATLAS  
30 dataset. We note that this does not provide a representation of a true stroke  
31 distribution, but rather shows the distribution of lesions included in this  
32 dataset. To do this, we performed a population-based averaging of all the  
33 individual primary lesion labels in MNI space, producing a voxel-wise map  
34 where values can range from 0 at each voxel (always background for all  
35 subjects) to 1 (100% presence of the lesion label across subjects). A  
36 probabilistic spatial map of the primary lesions can be found in Figure 3 and a  
37 3D visualization of the lesion map can be found in the following video link:  
38 <https://www.youtube.com/watch?v=Ag5CUuRNY9Q>. In addition, this map has  
39 also been provided in NIFTI format (.nii.gz) and uploaded to NeuroVault.org,  
40 an open-source database for neuroimaging data where it can be freely  
41 accessed (<https://neurovault.org/collections/3073/>).

### 43 **Data Records**

44 The full raw dataset (*native dataset*, n=304) is archived with the Archive  
45 of Disability Data to Enable Policy research at the Inter-university Consortium  
46 for Political and Social Research (ICPSR). ICPSR is the world's largest social  
47 science data archive that supports several substantive-area archive  
48 collections including disability and rehabilitation. ICPSR provides access to  
49 the data and provides technical assistance to individuals accessing the data.  
50 In addition, a standardized, defaced subset of the dataset (*standardized*  
51 *dataset*, n=229) is archived with the International Data Sharing Initiative, which

1 hosts many widely available neuroimaging datasets such as the Functional  
2 Connectome Project (FCP-INDI). See *Usage Notes* for more details regarding  
3 access.

4 For the full dataset archived with ICPSR, the naming convention and  
5 description of the files in ATLAS R1.1 can be found in Table 3. Within the  
6 ATLAS R1.1 main folder, there is an excel file with the metadata for the entire  
7 dataset. The data in this archive is in native space (i.e., original subject space;  
8 n=304). Throughout the dataset, MRIs are named and sorted based on each  
9 cohort (c); each cohort is in the format of cXXXX where XXXX is the number  
10 that the cohort was assigned (e.g., c0001). There are 11 total cohorts. Within  
11 each cohort folder are the individual subject(s) folders. Subject folders are  
12 named based on the cohort that they are in (cXXXX), the subject number that  
13 they were assigned (sXXXX) and the time point at which they were taken  
14 (tXX) (e.g. c0001s0004t01). For instance, participants with data taken two  
15 weeks apart would have two time points, where t01 is the first time point and  
16 t02 is the second. Every image starts with the subject identifier of  
17 cXXXXsXXXXtXX.

18 Each subject folder has several components: at minimum, each will  
19 have the original T1-weighted MRI image (\*.nii.gz) and three masks for the  
20 main lesion: the unsmoothed lesion mask (\*LesionRaw.voi), and two  
21 smoothed lesion masks in .voi and .nii.gz formats (\*LesionSmooth.voi;  
22 \*LesionSmooth.nii.gz). The LesionRaw volume is the original hand-traced  
23 lesion volume, while the LesionSmooth volume used a Gaussian smoothing  
24 kernel (full width half maximum parameter set to 2 mm, threshold set to 0.5, to  
25 overcome small errors between slices in tracing; see *Methods* above). We  
26 anticipated that most researchers would use the LesionSmooth volume as it is  
27 slightly more robust to small slice-by-slice human errors, and therefore  
28 created the .nii.giz version from this. Notably, the .voi files are in an MRICron  
29 format so the masks can be further edited in MRICron if desired. The .nii.gz  
30 files use the standard NIFTI format<sup>28</sup> (<http://nifti.nimh.nih.gov/nifti-1/>), which  
31 can be opened, edited, and viewed by most standard neuroimaging software.

32 If a particular subject had multiple lesions, for each additional lesion,  
33 there would be three additional lesion masks (e.g. \*LesionRaw\_1.voi,  
34 \*LesionSmooth\_1.voi, \*LesionSmooth\_1.nii.gz). In general, lesions were  
35 ranked based on size where the largest lesion was considered the main  
36 lesion. As mentioned previously, if the largest lesion differed from the primary  
37 lesion identified by the neuroradiologist, we deemed the primary lesion to be  
38 the one identified by the neuroradiologist. This occurred in less than 5% of  
39 cases.

40 Finally, in the FCP-INDI archive (standardized dataset, n=229), there is  
41 a separate naming convention, following the Brain Imaging Data Structure  
42 (<http://bids.neuroimaging.io/>), adopted by FCP-INDI. Images in this dataset  
43 have been normalized to a standard MNI-152 template, intensity normalized,  
44 and defaced. Table 3 provides a list of all naming conventions and filenames,  
45 along with descriptions.

46  
47 **Table 3.** Filenames and file descriptions for ATLAS R1.1 dataset. \* represents  
48 a wildcard.

49  
**ICPSR ARCHIVE**

| <a href="http://www.icpsr.umich.edu/icpsrweb/ICPSR/studies/36684">http://www.icpsr.umich.edu/icpsrweb/ICPSR/studies/36684</a>                            |                                                                                                       |
|----------------------------------------------------------------------------------------------------------------------------------------------------------|-------------------------------------------------------------------------------------------------------|
| <b>native folder (n=304)</b>                                                                                                                             |                                                                                                       |
| Filename or Identifier                                                                                                                                   | Description                                                                                           |
| cXXXXsXXXXtXX.nii.gz                                                                                                                                     | Raw T1-weighted MRI for each subject, where c = cohort number, s = subject number, and t = time point |
| *LesionRaw.voi                                                                                                                                           | Raw primary lesion mask, drawn as a volume of interest in MRICron                                     |
| *LesionSmooth.voi                                                                                                                                        | Smoothed primary lesion mask, drawn as a volume of interest in MRICron                                |
| *LesionSmooth.nii.gz                                                                                                                                     | Smoothed primary lesion mask, saved as a nifti file                                                   |
| *LesionRaw/Smooth_1(or 2, 3, ...).voi/.nii.gz                                                                                                            | Raw and smoothed secondary lesion masks (same as the three above, but for additional lesions)         |
| <b>INDI ARCHIVE</b><br><a href="http://fcon.1000.projects.nitrc.org/indi/retro/atlas.html">http://fcon.1000.projects.nitrc.org/indi/retro/atlas.html</a> |                                                                                                       |
| <b>standard folder (n=229)</b>                                                                                                                           |                                                                                                       |
| Filename or Identifier                                                                                                                                   | Description                                                                                           |
| Site, Subject ID, Session                                                                                                                                | Naming convention follows Brain Imaging Data Structure (BIDS) recommendations                         |
|                                                                                                                                                          |                                                                                                       |

1

2

3

### Technical Validation

4

Each trained tracer created lesion masks for the same five brains twice, one week apart, to assess both inter- and intra-tracer reliability. Training lesions ranged in size and difficulty (see *Methods*). Each tracer's lesion masks were compared, providing both inter- and intra-rater reproducibility measures. We first calculated inter- and intra-rater reliability measures using the lesion volumes. Based on lesion volumes, the inter-rater reliability was  $0.76 \pm 0.14$ , while the intra-rater reliability was  $0.84 \pm 0.09$ .

10

11

In addition, we also calculated inter- and intra-rater reliability using the Dice similarity coefficient (DC), which is a segmentation accuracy metric, and Hausdorff's distance (HD), which is a metric of the maximum distance between two volumes surface points. DC allows us to examine not only if the volumes are similar, but also if the same voxels are being selected as part of the lesion mask or not. This is particularly useful for comparing neuroimaging volumes, such as lesion masks. DC is calculated by the formula:

17

18

$$DC = \frac{2|X \cap Y|}{|X| + |Y|}$$

18

19

where X and Y represent the voxels from each lesion segmentation, and DC ranges from 0 to 1 (where 0 means there were no overlapping voxels and 1 means that the segmentations were completely the same). HD allows us to examine the distance between the surfaces of two images and thus can be used to identify outliers, providing another useful metric for comparing neuroimaging volumes. HD is calculated by the formula:

25

$$HD(X, Y) = \max\left\{\max_{x \in X} \min_{y \in Y} d(x, y), \max_{y \in Y} \min_{x \in X} d(y, x)\right\}$$

26

1  
2  
3  
4  
5  
6  
7  
8  
9  
10  
11  
12  
13  
14  
15  
16  
17  
18  
19  
20  
21  
22  
23  
24  
25  
26  
27  
28  
29  
30  
31  
32  
33  
34  
35  
36  
37  
38  
39  
40  
41  
42  
43  
44  
45  
46  
47  
48  
49  
50  
51

where  $x$  and  $y$  represent the surface points from the volumes  $X$  and  $Y$  respectively. HD is measured in millimeters, and a lower value denotes that the maximum distance between the two images is smaller.

Inter-rater scores (DC, HD) were calculated for each manual segmentation by comparing each individual tracer's lesion mask to the rest of the tracers' lesion masks. Inter-rater DC and inter-rater HD scores were then averaged to obtain one final DC score and one final HD score for the initial segmentations (average inter-rater DC for first segmentation:  $0.73 \pm 0.20$ ; average inter-rater HD for first segmentation:  $22.57 \pm 21.36$ mm) and for the second segmentations (average inter-rater DC for second segmentation: average inter-rater HD for second segmentations:  $25.29 \pm 23.53$ mm). Furthermore, intra-rater DC and HD scores were calculated for each brain traced by comparing the initial segmentation to the secondary segmentation for each tracer; these scores were then averaged to obtain a final intra-rater DC score ( $0.83 \pm 0.13$ ) and a final intra-rater HD value ( $21.02 \pm 22.66$ mm).

Trained tracers segmented all lesion masks. In addition, each lesion mask was checked by a separate tracer, and changes were made to the lesion mask as needed. Any difficulty identifying the lesion was discussed with the expert neuroradiologist. Lastly, after the completion of the dataset, lesion masks were checked a second time to ensure correct segmentation and data descriptors. It is important to note that while tracers did participate in a thorough training process and segmentations were checked multiple times, this is still a subjective process. Comments regarding the lesion masks can be submitted as issues on the ATLAS GitHub site (<https://github.com/npn/ATLAS/issues>), and we plan to publish updated and expanded versions of this dataset based on feedback and comments from users (see *Usage Notes*).

### Usage Notes

The full native-space archived dataset ( $n=304$ ) can be found at ICPSR: <http://www.icpsr.umich.edu/icpsrweb/ICPSR/studies/36684>. For more information on the data archive, visit the ICPSR website (<https://www.icpsr.umich.edu/icpsrweb>).

In addition, a standardized, intensity-normalized, defaced subset of the data ( $n=229$ ) can be found at FCP-INDI: [http://fcon\\_1000.projects.nitrc.org/indi/retro/atlas.html](http://fcon_1000.projects.nitrc.org/indi/retro/atlas.html).

Data is accessible under a standard Data Use Agreement, under which users must agree to only use the data for purposes as described in the agreement. Users of the ATLAS dataset should acknowledge the contributions of the original authors and research labs by properly citing this article and the data repository link from which they accessed the data.

As described above, lesions were segmented using the NITRC open source software MRICron which can be downloaded from the NITRC website (<https://www.nitrc.org/projects/mricron>). Users can also quickly and easily view the brains on BrainBox (<http://brainbox.pasteur.fr/>), an open-source Web application to collaboratively annotate and segment neuroimaging data available online<sup>29</sup>. For additional quick quantification, our group has also created a small package of scripts called SRQL (Semi-automated Robust



1 Quantification of Lesions), which provide three features: it uses a semi-  
2 automated white matter intensity correction to further correct for human errors  
3 in lesion tracing, outputs a report of descriptive statistics on lesions  
4 (hemisphere and volume of lesion), and gives users the option to perform  
5 analyses in native or standard space (<https://github.com/npnl/SRQL>)<sup>30</sup>. In  
6 addition, as we plan to grow this dataset in the future, additional releases of  
7 data or software will be announced on our ATLAS GitHub page  
8 (<https://github.com/npnl/ATLAS>). Any issues or feedback can also be  
9 submitted on the ATLAS GitHub page under “issues,” and a team of  
10 researchers will address these in a timely manner. Finally, as a general note  
11 regarding the usage of this dataset, we strongly encourage users to be  
12 cautious of overfitting training algorithms to this particular dataset. We note  
13 that this data is relatively diverse, given the data collection across 11 research  
14 sites worldwide. However, we caution users against overfitting to only a  
15 particular cohort or subset of this data. Future work will aim to provide  
16 additional test datasets for users to properly test their algorithms on untrained  
17 data.  
18  
19

1 **Acknowledgments**

2 We thank Dr. Mauricio Reyes for insightful conversations and would  
3 like to acknowledge the following people for their assistance on this effort:  
4 Anthony Benitez, Xiaoyu Chen, Cristi Magracia, Ryan Mori, Dhanashree  
5 Potdar, Sandyha Prathap. The archiving of this dataset was specifically  
6 supported by the NIH-funded Center for Large Data Research and Data  
7 Sharing in Rehabilitation (CLDR; <https://www.utmb.edu/cldr>) under a Category  
8 2 Pilot Grant (P2CHD06570) and this work was also funded by an NIH K01  
9 award (K01HD091283).

10

11

12 **Author contributions**

13

14 S.-L.L. conceptualized the study, reviewed lesions, analyzed data, established  
15 archives, and contributed to the writing and editing of the manuscript. J.M.A.  
16 segmented and reviewed lesions, oversaw the organization to the  
17 segmentation process and contributed to the writing and editing of the  
18 manuscript. N.W.B. organized, segmented and reviewed lesions. M.S.  
19 provided the neuroradiology expertise and information. K.L.I. and H.K.  
20 performed data analysis. H.K. also performed data processing and generated  
21 the standardized dataset and probabilistic lesion maps. T.A. provided data  
22 visualization expertise and generated the figures/videos. J.C., D.S., A.S. J.I.,  
23 C.J., W.N., D.V. and S.L. segmented and/or reviewed lesions. P.H., B.K.,  
24 N.K., L.A.-Z., S.C.C., J.L., S.S., L.T.W., J.W., C.W., C.Y. collected and  
25 provided the MRI data. M.L., A.P., and A.S. handled the archiving of the data.

26

27 **Competing interests**

28

29 The authors have no conflict of interest.

30

31

32

33

34

35

36

37

38

1 **Figure Legends**

2

3 Figure 1. A schematic diagram showing the steps performed on the data for  
4 each archive release.

5

6 Figure 2. An example of lesion segmentation in MRICron.

7

8 Figure 3. A probabilistic lesion overlap map for the primary lesions from the  
9 ATLAS R1.1 dataset. A 3D visualization of the lesion overlap map can be  
10 found at <https://www.youtube.com/watch?v=Ag5CUrNY9Q>.

11

12

1 **References**

2  
3  
4  
5  
6  
7  
8  
9  
10  
11  
12  
13  
14  
15  
16  
17  
18  
19  
20  
21  
22  
23  
24  
25  
26  
27  
28  
29  
30  
31  
32  
33  
34  
35  
36  
37  
38  
39  
40  
41  
42  
43  
44  
45  
46  
47

1. Benjamin, E.J., *et al.* Heart Disease and Stroke Statistics-2017 Update: A Report From the American Heart Association. *Circulation* **135**, e146-e603 (2017).
2. Feigin, V.L., *et al.* Global and regional burden of stroke during 1990-2010: findings from the Global Burden of Disease Study 2010. *Lancet (London, England)* **383**, 245-254 (2014).
3. Kwakkel, G., Kollen, B.J., Van der Grond, J.V. & Prevo, A.J.H. Probability of regaining dexterity in the flaccid upper limb: Impact of severity of paresis and time since onset in acute stroke. *Stroke* **34**, 2181-2186 (2003).
4. Ren, J., Kaplan, P.L., Charette, M.F., Speller, H. & Finklestein, S.P. Time window of intracisternal osteogenic protein-1 in enhancing functional recovery after stroke. *Neuropharmacology* **39**, 860-865 (2000).
5. Group, I.-C. Association between brain imaging signs, early and late outcomes, and response to intravenous alteplase after acute ischaemic stroke in the third International Stroke Trial (IST-3): secondary analysis of a randomised controlled trial. *The Lancet Neurology* **14**, 485-496 (2015).
6. Burke Quinlan, E., *et al.* Neural function, injury, and stroke subtype predict treatment gains after stroke. *Ann Neurol* **77**, 132-145 (2015).
7. Marie-Hélène, M. & Cramer, S.C. Biomarkers of recovery after stroke. *Current opinion in neurology* **21**, 654-659 (2008).
8. Nijland, R.H.M., van Wegen, E.E.H., Harmeling-van der Wel, B.C. & Kwakkel, G. Presence of finger extension and shoulder abduction within 72 Hours after stroke predicts functional recovery. *Stroke* **41**, 745-750 (2010).
9. Riley, J.D., *et al.* Anatomy of stroke injury predicts gains from therapy. *Stroke* **42**, 421-426 (2011).
10. Cramer, S.C., *et al.* Predicting functional gains in a stroke trial. *Stroke* **38**, 2108-2114 (2007).
11. Jongbloed, L.Y.N. Prediction of function after stroke: a critical review. *Stroke* **17**, 765-776 (1986).
12. Nouri, S. & Cramer, S.C. Anatomy and physiology predict response to motor cortex stimulation after stroke. *Neurology* **77**, 1076-1083 (2011).
13. Prabhakaran, S., *et al.* Inter-individual variability in the capacity for motor recovery after ischemic stroke. *Neurorehabilitation and Neural Repair* **22**, 64-71 (2007).
14. Stinear, C. Prediction of recovery of motor function after stroke. *The Lancet Neurology* **9**, 1228-1232 (2010).
15. Zhu, L.L., Lindenberg, R., Alexander, M.P. & Schlaug, G. Lesion load of the corticospinal tract predicts motor impairment in chronic stroke. *Stroke* **41**, 910-915 (2010).

- 1 16. Fiez, J.A., Damasio, H. & Grabowski, T.J. Lesion segmentation  
2 and manual warping to a reference brain: Intra- and interobserver  
3 reliability. *Human Brain Mapping* **9**, 192-211 (2000).
- 4 17. Montaner, J., *et al.* Plasmatic level of neuroinflammatory markers  
5 predict the extent of diffusion-weighted image lesions in  
6 hyperacute stroke. *Journal of Cerebral Blood Flow & Metabolism*  
7 **23**, 1403-1407 (2003).
- 8 18. Sakamoto, Y., *et al.* Early ischaemic diffusion lesion reduction in  
9 patients treated with intravenous tissue plasminogen activator:  
10 infrequent, but significantly associated with recanalization.  
11 *International Journal of Stroke* **8**, 321-326 (2013).
- 12 19. Thomas, R.G.R., *et al.* Apparent diffusion coefficient thresholds  
13 and diffusion lesion volume in acute stroke. *Journal of Stroke and*  
14 *Cerebrovascular Diseases* **22**, 906-909 (2013).
- 15 20. Wittsack, H.-J., *et al.* MR Imaging in Acute Stroke: Diffusion-  
16 weighted and Perfusion Imaging Parameters for Predicting Infarct  
17 Size. *Radiology* **222**, 397-403 (2002).
- 18 21. Pustina, D., *et al.* Automated segmentation of chronic stroke  
19 lesions using LINDA: Lesion identification with neighborhood data  
20 analysis. *Human Brain Mapping* **37**, 1405-1421 (2016).
- 21 22. de Haan, B., Clas, P., Juenger, H., Wilke, M. & Karnath, H.-O.  
22 Fast semi-automated lesion demarcation in stroke. *NeuroImage.*  
23 *Clinical* **9**, 69-74 (2015).
- 24 23. Maier, O., *et al.* ISLES 2015 - A public evaluation benchmark for  
25 ischemic stroke lesion segmentation from multispectral MRI.  
26 *Medical Image Analysis* **35**, 250-269 (2017).
- 27 24. Rorden, C. & Brett, M. Stereotaxic display of brain lesions. *Behav*  
28 *Neurol* **12**, 191-200 (2000).
- 29 25. Fazekas, F., Chawluk, J., Alavi, A., Hurtig, H. & Zimmerman, R.  
30 MR signal abnormalities at 1.5 T in Alzheimer's dementia and  
31 normal aging. *American Journal of Roentgenology* **149**, 351-356  
32 (1987).
- 33 26. Sled, J.G., Zijdenbos, A.P. & Evans, A.C. A nonparametric  
34 method for automatic correction of intensity nonuniformity in MRI  
35 data. *IEEE Transactions on Medical Imaging* **17**, 87-97 (1998).
- 36 27. Collins, L., D., Neelin, P., Peters, T., M. & Evans, A., C. Automatic  
37 3D intersubject registration of MR volumetric data in standardized  
38 Talairach space. *Journal of Computer Assisted Tomography* **18**,  
39 192-205 (1994).
- 40 28. Cox, R.W., *et al.* A (sort of) new image data format standard: Nifti-  
41 1. *Neuroimage* **22**, e1440 (2004).
- 42 29. Heuer, K., Ghosh, S., Robinson Sterling, A. & Toro, R. Open  
43 Neuroimaging Laboratory. *Research Ideas and Outcomes* **2**,  
44 e9113 (2016).
- 45 30. Ito, K., Anglin, J. & Liew, S.-L. Semi-automated Robust  
46 Quantification of Lesions (SRQL) Toolbox. *Research Ideas and*  
47 *Outcomes* **3**, e12259 (2017).



Manual lesion segmentation performed on native (raw) T1-weighted MRIs

```
graph TD; A[Manual lesion segmentation performed on native (raw) T1-weighted MRIs] --> B[ARCHIVE #1: Full raw dataset archived on ICPSR (n=304)]; B --> C[Data processed: Defacing, intensity normalization, normalization to standard space (MNI-152 template)]; C --> D[ARCHIVE #2: Normalized dataset archived on FCP/INDI (n=229)];
```

ARCHIVE #1:  
Full raw dataset archived on  
ICPSR (n=304)

Data processed: Defacing,  
intensity normalization,  
normalization to standard  
space (MNI-152 template)

ARCHIVE #2:  
Normalized dataset archived  
on FCP/INDI (n=229)

44x4x25= 69.00000

X 174 Y 92 Z 124 x1

Background 6.0000 297.0000 Grayscale

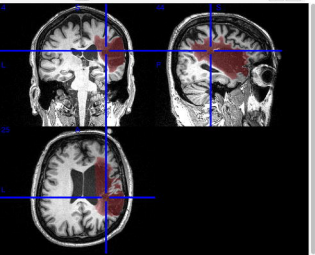

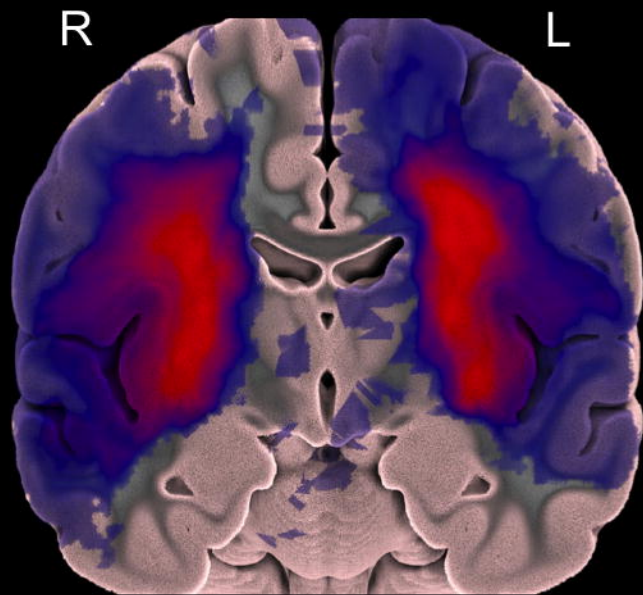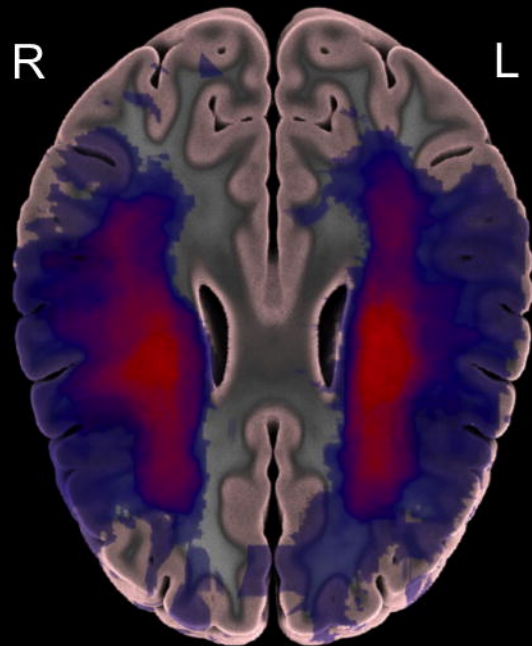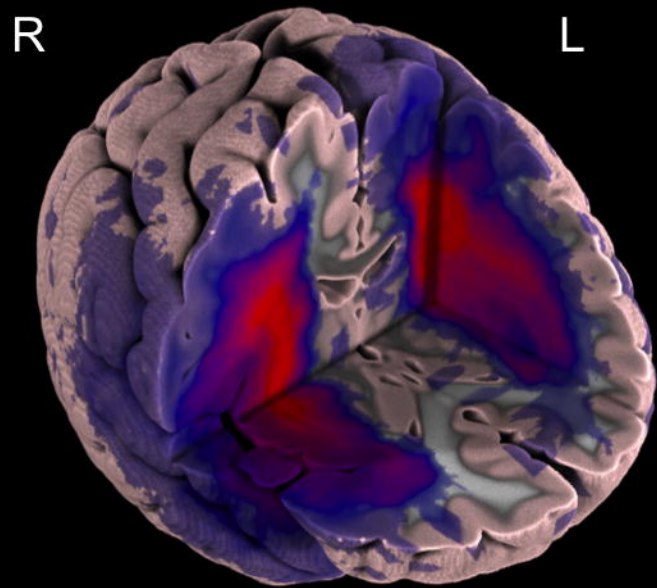

Source: https://www.biorxiv.org/content/10.1101/179614v2.full.pdf
